# Supplementary material for: Beneficial Effects of Mindfulness-Based Stress Reduction Training on the Well-Being of a Female Sample during the First Total Lockdown Due to COVID-19 Pandemic in Italy
Source: MDPI journal article supplement (doi:10.3390/ijerph18115512), 2021-05-21
Supplement: s1 [file s1]

**Table S1.** Baseline data (expressed as average score and standard deviation) and between-group statistical differences.

| Test | Scale | MBSR Group  | Control Group | t     | p        |
|------|-------|-------------|---------------|-------|----------|
| FFMQ | Tot   | 24.4 (4.35) | 26.8 (4.65)   | -1.33 | 0.19     |
|      | OBS   | 23.9 (6.23) | 26.4 (5.26)   | -1.08 | 0.29     |
|      | DES   | 27 (7.02)   | 30.5 (7.70)   | -1.19 | 0.25     |
|      | AWA   | 27.6 (6.20) | 29.5 (6.50)   | -0.77 | 0.45     |
|      | NJU   | 28.1 (5.90) | 27.5 (6.36)   | 0.28  | 0.78     |
|      | NRE   | 15.8 (3.97) | 20.4 (3.72)   | -2.97 | 0.007*   |
| PWB  | Tot   | 49.2 (12.5) | 66.4 (14.7)   | -3.21 | 0.004*   |
|      | AU    | 8.33 (3.31) | 9.18 (3.82)   | -0.6  | 0.55     |
|      | EM    | 8.13 (2.23) | 9.64 (3.59)   | -1.32 | 0.2      |
|      | PG    | 8.07 (2.25) | 12.1 (1.58)   | -5.07 | < 0.001* |
|      | PR    | 8.47 (1.77) | 12.6 (1.80)   | -5.89 | < 0.001* |
|      | PL    | 8.13 (2.97) | 11.5 (3.64)   | -2.56 | 0.017*   |
|      | SA    | 8.07 (3.28) | 11.4 (3.98)   | -2.31 | 0.03*    |

Asterisks \*  $p < 0.05$ , \*\*  $p < 0.01$ , \*\*\*  $p < 0.001$ . Abbreviations: FFMQ = Five Facet Mindfulness Questionnaire; PWB = Psychological Well-Being; OBS = Observing; DES = Describing; AWA = Acting With Awareness; NJU = Non-judging of inner experience; NRE = Non-reactivity to inner experience; AU = Autonomy; EM = Environmental Mastery; PG = Personal Growth; PR = Positive Relations; PL = Purpose in Life; SA = Self-Acceptance.

**Table S2.** Pre/post scores (expressed in the table as average and standard deviation) and results of the ANOVAs (detailed for the main effect of Group, the main effect of Time and the interaction effect between Group and Time).

| Test | Scale | MBSR Group Pre | MBSR Group Post | Control Group Pre | Control Group Post | Group |          | Time  |          | Group × Time |          |
|------|-------|----------------|-----------------|-------------------|--------------------|-------|----------|-------|----------|--------------|----------|
|      |       | M (SD)         | M (SD)          | M (SD)            | M (SD)             | F     | p        | F     | p        | F            | p        |
| FFMQ | Tot   | 24.4 (4.35)    | 28.1 (3.98)     | 26.8 (4.65)       | 26.5 (6.46)        | 0.05  | 0.82     | 3.69  | 0.06     | 5.08         | 0.034*   |
|      | OBS   | 23.9 (6.23)    | 30.5 (4.27)     | 26.4 (5.26)       | 29.4 (6.19)        | 0.15  | 0.69     | 13.99 | 0.001*   | 1.97         | 0.17     |
|      | DES   | 27 (7.02)      | 29.5 (6.28)     | 30.5 (7.70)       | 26.6 (10.7)        | 0.009 | 0.92     | 0.29  | 0.59     | 7.1          | 0.014*   |
|      | AWA   | 27.6 (6.20)    | 27.7 (4.98)     | 29.5 (6.50)       | 28.5 (8.54)        | 0.37  | 0.55     | 0.12  | 0.72     | 0.21         | 0.65     |
|      | NJU   | 28.1 (5.90)    | 30.2 (7.49)     | 27.5 (6.36)       | 26.6 (8.54)        | 0.64  | 0.43     | 0.44  | 0.51     | 2            | 0.14     |
|      | NRE   | 15.8 (3.97)    | 22.7 (4.32)     | 20.4 (3.72)       | 21.5 (5.72)        | 1.28  | 0.26     | 20.2  | < 0.001* | 10.1         | 0.004*   |
| PWB  | Tot   | 49.2 (12.5)    | 61 (14.3)       | 66.4 (14.7)       | 62.5 (12.4)        | 3.18  | 0.08     | 10.9  | 0.003*   | 43.2         | < 0.001* |
|      | AU    | 8.33 (3.31)    | 8.87 (4.22)     | 9.18 (3.82)       | 9.45 (3.64)        | 0.27  | 0.61     | 0.48  | 0.49     | 0.05         | 0.82     |
|      | EM    | 8.13 (2.23)    | 9.2 (3.97)      | 9.64 (3.59)       | 9.64 (3.59)        | 0.62  | 0.44     | 1.03  | 0.32     | 1.03         | 0.32     |
|      | PG    | 8.07 (2.25)    | 11.2 (2.01)     | 12.1 (1.58)       | 11.7 (1.10)        | 11.9  | < 0.001* | 6.86  | 0.015*   | 10.94        | 0.003*   |
|      | PR    | 8.47 (1.77)    | 10.1 (2.33)     | 12.6 (1.80)       | 12.5 (2.25)        | 19.1  | < 0.001* | 4.87  | 0.037*   | 7.55         | 0.011*   |
|      | PL    | 8.13 (2.97)    | 11.2 (3.75)     | 11.5 (3.64)       | 9.45 (2.84)        | 0.4   | 0.53     | 1.34  | 0.25     | 30.33        | < 0.001* |
|      | SA    | 8.07 (3.28)    | 10.4 (3.04)     | 11.4 (3.98)       | 9.73 (3.93)        | 0.95  | 0.34     | 0.93  | 0.34     | 30           | < 0.001* |

Asterisks \*  $p < 0.05$ , \*\*  $p < 0.01$ , \*\*\*  $p < 0.001$ . Abbreviations: FFMQ = Five Facet Mindfulness Questionnaire; PWB = Psychological Well-Being; OBS = Observing; DES = Describing; AWA = Acting With Awareness; NJU = Non-judging of inner experience; NRE = Non-reactivity to inner experience; AU = Autonomy; EM = Environmental Mastery; PG = Personal Growth; PR = Positive Relations; PL = Purpose in Life; SA = Self-Acceptance.

**Table S3.** PTGI scores (expressed as average score and standard deviation) and between-group statistical differences. AAQ-II scores expressed as average score and standard deviation) and within-group statistical differences.

| Test | Scale | MBSR Group  | Control Group | t     | p       |
|------|-------|-------------|---------------|-------|---------|
| PTGI | Tot   | 36.6 (20)   | 29 (16.4)     | 1.03  | 0.31    |
|      | RO    | 10.7 (6.93) | 5.91 (3.91)   | 20.71 | 0.049 * |

|        |     |             |             |          |          |
|--------|-----|-------------|-------------|----------|----------|
|        | NP  | 8.27 (4.80) | 7.27 (4.94) | 0.51     | 0.61     |
|        | PS  | 7.33 (3.96) | 5.55 (3.78) | 11.59    | 0.26     |
|        | SC  | 1.93 (2.25) | 1.09 (2.07) | 0.97     | 0.34     |
|        | AL  | 6.27 (3.73) | 6.18 (2.89) | 0.06     | 0.95     |
| AAQ-II | Tot | <b>PRE</b>  | <b>POST</b> | <b>t</b> | <b>p</b> |
|        |     | 35.5 (6.23) | 28.1 (9.74) | 2.2      | 0.045*   |

Asterisks \*  $p < 0.05$ , \*\*  $p < 0.01$ , \*\*\*  $p < 0.001$ . Abbreviations: PTGI = Post-Traumatic Growth Inventory; RO = relation to others; NP = new possibilities; PS = personal strength; SC = spiritual changes; AAQ-II = The Acceptance and Action Questionnaire-II.

**Table S4.** Model fit indices and unstandardized path coefficients for hypothesized mediation model.

| Predictor               | Mediator                  | Outcome                | Total Effect       | Direct Effect      | Indirect Effect  |
|-------------------------|---------------------------|------------------------|--------------------|--------------------|------------------|
|                         |                           |                        | SE-[95% CI]        | SE-[95% CI]        | SE-[95% CI]      |
| FFMQ pre-MBSR training  | AAQ-II pre-MSBR training  | PWB pre-MSBR training  | 1.6206–0.6570      | 1.9582–0.6515      | –0.3376–0.3929   |
|                         |                           |                        | [0.2011   3.0401]* | [0.5384   3.3780]* | [–1.1850–0.4261] |
| FFMQ post-MBSR training | AAQ-II post-MSBR training | PWB post-MSBR training | 2.1831–0.6571      | 1.1924–0.5823      | 0.9907–0.4845    |
|                         |                           |                        | [0.7632–3.6029]*   | [–0.0766–2.4614]   | [0.1377–2.0859]* |

SE = Standard Error; CI = Confidence Interval; \*  $p < 0.05$ .
